# Supplementary material for: Effects of 1-Methylcyclopropene Treatment on Physicochemical Attributes of “Hai Jiang” Yardlong Bean during Cold Storage
Source: Hindawi journal article supplement (doi:10.1155/2018/7267164), 2018-09-09
Supplement: f1 [file 7267164.f1.xls]

## Sheet: Weight loss
	CK	0.75 μL/L	1 μL/L	1.25 μL/L	1.5 μL/L
0	0	0	0	0	0
3	1.89701	1.5897	0.772498	0.851737	1.64997
6	6.72638	4.26617	3.7722	5.57888	5.99658
9	8.49738	7.6566	6.81203	6.26939	7.46696
12	12.9862	10.0798	10.0425	10.7471	12.3299
15	19.8045	11.8115	10.06	11.9061	14.3082
18	21.0442	14.0541	13.8314	14.0415	19.4236
21	25.9519	17.0752	16.694	18.2698	22.6085
		Weight loss(%)		Good fruit(%)		Firmness(N)
	Treatments	3 d	21 d	3 d	21 d	3 d	21 d
	CK	1.9	26	75	32	7.2±0.001	3.3±0.004
	0.75 μL/L	1.6	17.1	90	47	7.3±0.05	4.0±0.014
	1 μL/L	0.8	16.7	89	51	7.4±0.015	4.2±0.001
	1.25 μL/L	0.9	18.3	80	43	7.5±0.016	3.8±0.007
	1.5 μL/L	1.6	22.6	80	36	7.6±0.001	3.5±0.014

## Sheet: Good fruits
	CK	0.75 μL/L	1 μL/L	1.25 μL/L	1.5 μL/L
0	95	95	95	95	95
3	75	90	89	80	80
6	70	80	85	75	75
9	60	75	80	70	60
12	50	70	75	65	55
15	46	62	65	54	49
18	39	53	58	46	40
21	32	47	51	43	36

## Sheet: Firmness
	CK	SE	0.75 μL/L	SE	1 μL/L	SE	1.25 μL/L	SE	1.5 μL/L	SE
0	7.90615	0.0240328	7.90615	0.0240328	7.90615	0.0240328	7.90615	0.0240328	7.90615	0.0240328
3	7.21171	0.00108889	7.26507	0.0498992	7.38593	0.0154377	7.45018	0.0164779	7.64073	0.0098
6	6.36673	0.00680011	6.44513	0.0330456	6.61391	0.0214486	6.52353	0.0462361	6.42771	0.0322466
9	5.58709	0.0133805	6.19251	0.0171132	6.32644	0.0183179	6.00087	0.0179914	5.74716	0.0141556
12	4.704	0.0375785	5.12649	0.082648	5.5076	0.0594318	5.01216	0.00949271	4.99147	0.0487817
15	4.28696	0.0418479	4.65173	0.0361308	4.70618	0.022102	4.48078	0.00949271	4.54611	0.0188915
18	3.95484	0.00949271	4.42524	0.00949271	4.53522	0.00435556	4.3022	0.00680011	4.09422	0.0113683
21	3.34398	0.00392604	4.02453	0.0136002	4.24122	0.00967826	3.84269	0.00714032	3.54216	0.0136437

## Sheet: L  value
	CK	SE	0.75 μL/L	SE	1 μL/L	SE	1.25 μL/L	SE	1.5 μL/L	SE
0	59.86	0.454441	59.86	0.454441	59.86	0.454441	59.86	0.454441	59.86	0.454441
3	59.95	0.394631	63.2667	0.593783	62.5933	0.24251	61.9567	0.326871	61.9833	0.505316
6	63.16	0.223383	63.0033	0.101708	63.5633	0.236807	62.18	0.260576	62.07	0.155671
9	62.72	0.217945	65.49	0.234379	65.8333	0.353522	63.68	0.285132	63.4533	0.205129
12	60.68	0.346458	62.95	0.22723	63.5233	0.156027	62.7267	0.275338	61.6667	0.198354
15	59.4267	0.24504	61.91	0.575007	62.98	0.537029	60.0733	0.280852	59.5033	0.255799
18	57.9333	0.418184	60.7933	0.552519	62.42	0.359073	59.4133	0.170522	58.2833	0.103655
21	56.41	0.293087	59.67	0.591016	61.39	0.3751	58.1033	0.299128	56.79	0.386954

## Sheet: a  value
	CK	SE	0.75 μL/L	SE	1 μL/L	SE	1.25 μL/L	SE	1.5 μL/L	SE
0	-6.725	0.0670199	-6.725	0.0670199	-6.725	0.0670199	-6.725	0.0670199	-6.725	0.0670199
3	-5.52667	0.0664162	-6.12333	0.0425572	-6.57667	0.0366667	-6.10333	0.00666667	-5.87333	0.0829324
6	-5.48	0.0152753	-5.93667	0.0176383	-6.53333	0.0664162	-5.84333	0.0523874	-5.83667	0.0352767
9	-5.43667	0.0674125	-5.67667	0.0600925	-6.35667	0.0366667	-5.69	0.0665833	-5.56	0.0152753
12	-4.95	0.0360555	-5.46	0.080829	-5.98	0.0450925	-5.20667	0.0384419	-4.95333	0.0185592
15	-4.46333	0.196497	-5.01667	0.0883805	-5.83333	0.0466667	-4.75667	0.069602	-4.62667	0.0352767
18	-4.38	0.10116	-4.60333	0.0497773	-5.68	0.105357	-4.53667	0.0497773	-4.53667	0.0533333
21	-4.08667	0.0491031	-4.58	0.02	-5.25667	0.0712585	-4.24667	0.0768838	-4.43	0.0264575

## Sheet: b value
	CK	SE	0.75 μL/L	SE	1 μL/L	SE	1.25 μL/L	SE	1.5 μL/L	SE
0	19.88	0.2844	19.88	0.2844	19.88	0.2844	19.88	0.2844	19.88	0.2844
3	22.8767	0.424434	21.91	0.235443	21.1733	0.341093	22.1233	0.628552	22.6367	0.224301
6	23.76	0.346458	22.03	0.151767	21.6833	0.25208	22.7467	0.134205	23.4067	0.358438
9	23.6667	0.525368	22.4833	0.200028	22.32	0.363456	22.8467	0.312001	23.5	0.219317
12	24.2433	0.306884	22.7933	0.3444	22.64	0.197315	23.0867	0.0202759	23.9867	0.50762
15	24.26	0.0608276	22.87	0.315013	22.7933	0.152352	23.3867	0.233619	24.0367	0.530608
18	25.6833	0.154524	23.56	0.221435	22.9867	0.269093	24.1267	0.162925	25.1133	0.271805
21	25.5433	0.147234	24.7433	0.335973	24.26	0.236291	25.1267	0.0266667	25.41	0.145029

## Sheet: Chlorophyll content
	CK	SE	0.75 μL/L	SE	1 μL/L	SE	1.25 μL/L	SE	1.5 μL/L	SE
0	0.33379	0.00460907	0.33379	0.00460907	0.33379	0.00460907	0.33379	0.00460907	0.33379	0.00460907
3	0.228496	0.000179574	0.283139	0.00207238	0.282798	0.00229459	0.281428	0.00328014	0.251197	0.00434664
6	0.169114	0.000237163	0.258861	0.00433309	0.274867	0.00417168	0.220823	0.00175355	0.196838	0.00677577
9	0.145861	0.0032582	0.208606	0.00124968	0.25008	0.00152289	0.191137	0.0017508	0.16612	0.00263762
12	0.129776	0.00300857	0.203315	0.00433412	0.215476	0.00112726	0.172745	0.00253701	0.154553	0.00303421
15	0.121394	0.00370063	0.188165	0.00659019	0.20024	0.000944818	0.158576	0.00524675	0.141744	0.0102582
18	0.114305	0.00232395	0.170209	0.0045835	0.181975	0.0012348	0.151588	0.00240354	0.136701	0.00599091
21	0.116188	0.00292385	0.162207	0.00487431	0.175398	0.00385643	0.147265	0.00176966	0.134931	0.00482774
					叶 CK	V CK
					0.33379	39.9015
					0.228496	32.4786
					0.169114	27.9522
					0.145861	22.9481
					0.129776	19.1781
					0.121394	13.9847
					0.114305	8.58586
					0.116188	2.65957

## Sheet: VC
	CK	SE	0.75 μL/L	SE	1 μL/L	SE	1.25 μL/L	SE	1.5 μL/L	SE
0	39.9015	1.04499	39.9015	1.04499	39.9015	1.04499	39.9015	1.04499	39.9015	1.04499
3	32.4786	2.01535	35.3846	1.18431	36.2393	0.452265	34.359	0.512821	32.9915	0.951755
6	27.9522	1.22352	28.2511	0.258901	31.5396	0.538946	31.5396	1.04634	28.9985	0.395479
9	22.9481	1.20789	28.8107	0.167504	29.8157	0.670017	26.6332	1.32952	24.4556	0.443174
12	19.1781	0.950532	26.484	0.26363	27.3973	0.26363	22.6788	0.54879	21.1568	0.925839
15	13.9847	0.690719	19.1571	0.506849	20.4981	0.506849	17.2414	0.877888	15.3257	1.63678
18	8.58586	0.291591	16.33	1.02403	18.8552	0.445413	16.4983	0.606995	11.9529	0.841751
21	2.65957	1.62503	12.0567	1.69138	16.6667	0.772854	10.9929	0.177305	6.02837	0.772854

## Sheet: MDA
	CK	SE	0.75 μL/L	SE	1 μL/L	SE	1.25 μL/L	SE	1.5 μL/L	SE
0	0.839349	0.0228785	0.839349	0.0228785	0.839349	0.0228785	0.839349	0.0228785	0.839349	0.0228785
3	1.13525	0.0307108	0.95844	0.0353326	0.977385	0.014197	0.936226	0.0528673	0.870914	0.027253
6	1.06471	0.0354157	0.920928	0.0195972	1.07331	0.0592892	0.808797	0.0510986	0.872185	0.0342008
9	1.23114	0.0359134	1.17698	0.0359573	1.02752	0.0262458	0.924881	0.0264413	1.1	0.0275486
12	1.67903	0.0297183	1.05935	0.0329996	1.10048	0.0887132	1.24591	0.0326702	1.35644	0.0452924
15	1.83934	0.0108779	1.44547	0.0133834	1.36368	0.0772489	1.60665	0.0397542	1.65545	0.0297017
18	2.03256	0.0388423	1.44775	0.0165611	1.44471	0.0266156	1.60346	0.0906371	1.94664	0.00924378
21	2.49455	0.0129964	2.00934	0.0267021	2.07555	0.0608925	2.22354	0.00291393	2.59276	0.0175693

## Sheet: SOD
	CK	SE	0.75 μL/L	SE	1 μL/L	SE	1.25 μL/L	SE	1.5 μL/L	SE
0	7.76714	0.0802371	7.76714	0.0802371	7.76714	0.0802371	7.76714	0.0802371	7.76714	0.0802371
3	8.02655	0.227816	6.30658	0.679441	6.12553	0.953741	4.828	0.257815	4.1038	1.92908
6	15.0655	0.734368	16.0753	0.170442	20.2238	0.237931	18.6681	0.591059	18.2587	0.518559
9	13.4354	0.988728	21.0633	0.104177	24.6749	0.200179	19.6186	0.355048	14.9379	0.4014
12	9.38375	0.201992	20.7283	0.275878	27.3669	0.31192	15.6303	0.762502	13.8655	0.14555
15	6.37268	0.924839	16.9131	0.39792	20.5432	0.242001	16.94	0.336918	12.6109	0.234412
18	8.58982	0.31779	15.5848	0.170195	16.8998	0.954601	12.0313	0.840793	11.5277	0.651997
21	7.70198	0.436732	13.8007	0.1089	14.1779	0.144061	11.2858	0.401356	10.4055	0.16335

[truncated: 1 more sheets: POD]
